# Supplementary material
Source: PubMed Central journal article supplement (PMC3486559)
Supplement: AAC.01276-12_zac999101333so1.pdf [file AAC.01276-12_zac999101333so1.pdf]

## **Supplemental Data**

Supplemental Table 1. Oligonucleotide primers used in this study.

| Primer        | Sequence                                           |
|---------------|----------------------------------------------------|
| IMP-C221X-top | 5' - GAAAATATTATTTCGGTGGTNNNTTTATTAAACCGTACGG - 3' |
| IMP-C221X-bot | 5' - CCGTACGGTTTAATAAANNACCACCGAATAATATTTTC - 3'   |
| pTP123 top    | 5' - CATCCGGCTCGTATAATGTGTGGAATTGTG - 3'           |
| pTP123 bot    | 5' - CAGACCGCTTCTGCGTTCTGATTTAATCTG - 3'           |
| S121X IMP-1 F | 5' - CCTCTCATTTTCATAGCGACNNNACGGG - 3'             |
| S121X IMP-1 R | 5' - CCCGTNNNGTCGCTATGAAAATGAGAGG - 3'             |

Supplemental Table 2. IMP-1  $\beta$ -lactamase zinc content as determined by the PAR assay.

| Sample      | Raw zinc concentration ( $\mu$ M) | Relative zinc content (per enzyme) |
|-------------|-----------------------------------|------------------------------------|
| Buffer      | $0.16 \pm 0.02$                   | N/A                                |
| WT          | $10.2 \pm 0.01$                   | 2.04                               |
| WT (DPA)    | $5.3 \pm 0.10$                    | 1.06                               |
| C221G       | $5.0 \pm 0.10$                    | 1.01                               |
| C221G (DPA) | $4.8 \pm 0.10$                    | 0.96                               |

Supplemental Table 3. Data collection and refinement statistics for the IMP-1 C221G structures.

| Parameter                                     | Sulfate-bound                                 | Citrate-bound                                 |
|-----------------------------------------------|-----------------------------------------------|-----------------------------------------------|
| Space Group                                   | P2 <sub>1</sub> 2 <sub>1</sub> 2 <sub>1</sub> | P2 <sub>1</sub> 2 <sub>1</sub> 2 <sub>1</sub> |
| Cell dimensions <i>a, b, c</i> (Å)            | 50.02, 60.5, 84.29                            | 50.02, 59.77, 83.55                           |
| Cell dimensions $\alpha, \beta, \gamma$ (°)   | 90, 90, 90                                    | 90, 90, 90                                    |
| Resolution Range (Å)                          | 30.25-1.74 (1.81-1.74)*                       | 25.24-2.00 (2.07-2.00)                        |
| Molecules per asymmetric unit                 | 1                                             | 1                                             |
| Number of unique reflections                  | 26059                                         | 15635                                         |
| Completeness (%)                              | 97.5 (93.4)                                   | 89.2 (93.0)                                   |
| Redundancy                                    | 3.62 (3.43)                                   | 4.04 (3.86)                                   |
| I/ $\sigma$                                   | 13.7 (2.3)                                    | 11.2 (3.1)                                    |
| R <sub>merge</sub> (%)                        | 3.6 (30.6)                                    | 5.7 (31.1)                                    |
| R <sub>work</sub> (%) / R <sub>free</sub> (%) | 19.6/22.6                                     | 19.9/24.9                                     |
| Number of protein atoms                       | 1946                                          | 1852                                          |
| R.m.s. deviations                             |                                               |                                               |
| Bond lengths (Å)                              | 0.013                                         | 0.015                                         |
| Bond angles (°)                               | 0.987                                         | 1.044                                         |
| Ramachandran analysis                         |                                               |                                               |
| Preferred (%)                                 | 100                                           | 100                                           |
| Allowed (%)                                   | 0                                             | 0                                             |

\* Values in parentheses are for the highest resolution shell.

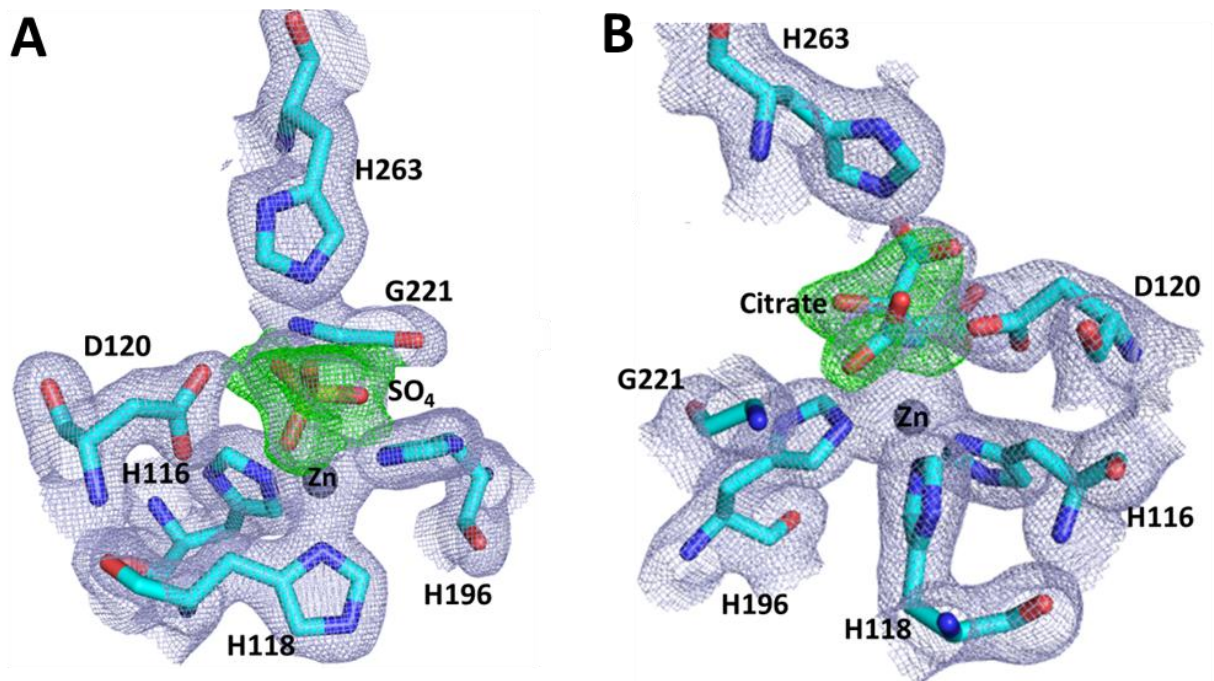

Supplemental Figure 1. Structure of IMP-1 C221G enzyme with electron density. Electron density maps around the Zn binding sites: the  $2F_o - F_c$  electron density maps (blue) contoured at  $1 \sigma$  for the residues composing the zinc coordinating sites. The  $F_o - F_c$  electron density maps (green) countered at  $2.8 \sigma$  used for modeling the sulfate ion (A) and citrate ion (B) is also represented. The residues and ions are labeled and shown as stick representation with carbon atoms in cyan, nitrogen in dark blue, oxygen in red and sulfur in yellow. Zn ion is represented as grey sphere.
